# Supplementary material for: Hierarchical Clustering-Based Coarse-to-Fine Classification Framework for Microbial Protein Function Prediction
Source: Research Square preprint supplement (doi:10.21203/rs.3.rs-7473073/v1), 2025-09-11
Supplement: Supplementary file 1 [file 84bc6bd9cb12778969d29601.xlsx]

## Sheet: Sheet1
	MFO	BPO	CCO
Layer1	44	48	16
Layer2	456	582	147
