# Supplementary material for: Hierarchical Clustering-Based Coarse-to-Fine Classification Framework for Microbial Protein Function Prediction
Source: Research Square preprint supplement (doi:10.21203/rs.3.rs-7473073/v1), 2025-09-11
Supplement: Supplementary file 2 [file a6f43a892470f353dac0eb20.xlsx]

## Sheet: Sheet1
	Training set	Validation set	Num of Labels
MFO	219632	74417	5518
BPO	142638	53804	7962
CCO	170965	82627	1556
EC	163152	18128	4238
